# Supplementary material for: Therapeutic Potential of 4-Hexylresorcinol in Preserving Testicular Function in Streptozotocin-Induced Diabetic Rats
Source: MDPI journal article supplement (doi:10.3390/ijms25084316), 2024-04-13

**Figure S1.** Immunohistochemical images. The expression level of LGR4 was lower in the STZ group than in the other groups (bar=100μm).

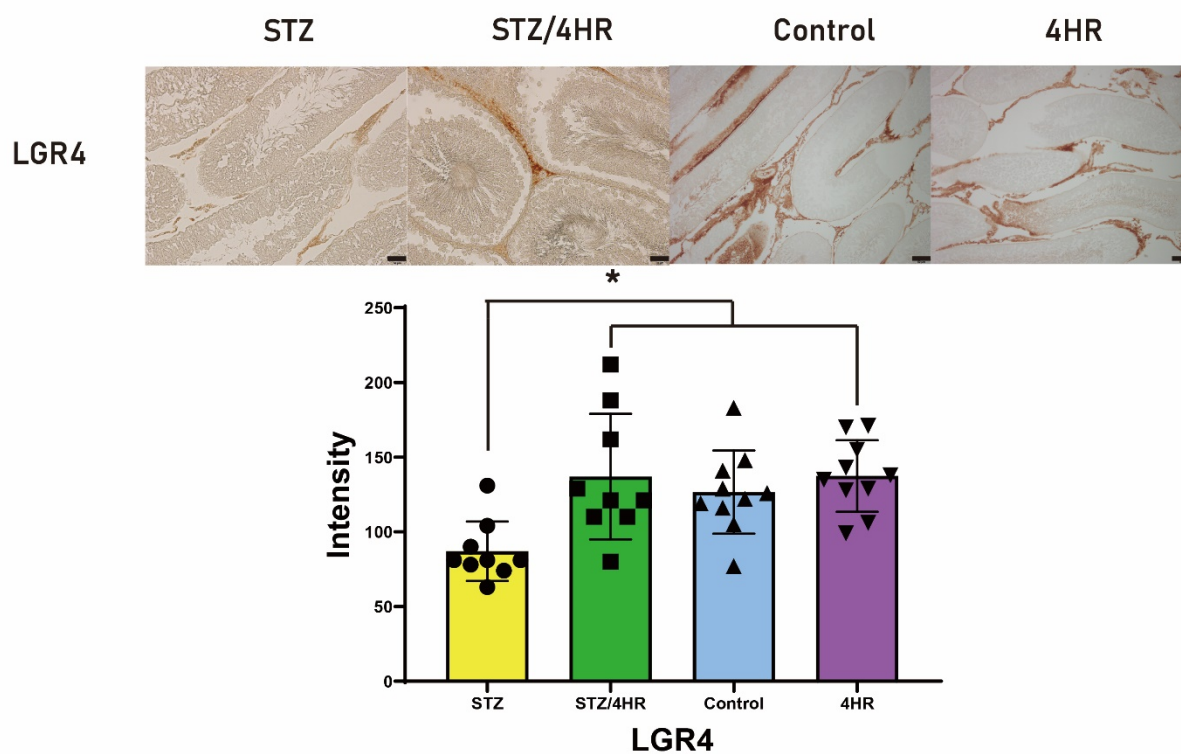

**Figure S2.** Histology and immunostaining of the pancreas (scale bar = 50 $\mu$ m) confirm the successful induction of type 1 diabetes through autopsy. The untreated group exhibited well-preserved islets of Langerhans (\*), in contrast to the STZ-injected group, which demonstrated significant destruction of these islets (\*). Correspondingly, insulin immunoreactivity was marked by strong intensity and extensive coverage in the untreated group (arrow), whereas the STZ-injected group displayed markedly reduced immunointensity and diminished areas of reactivity (arrow).

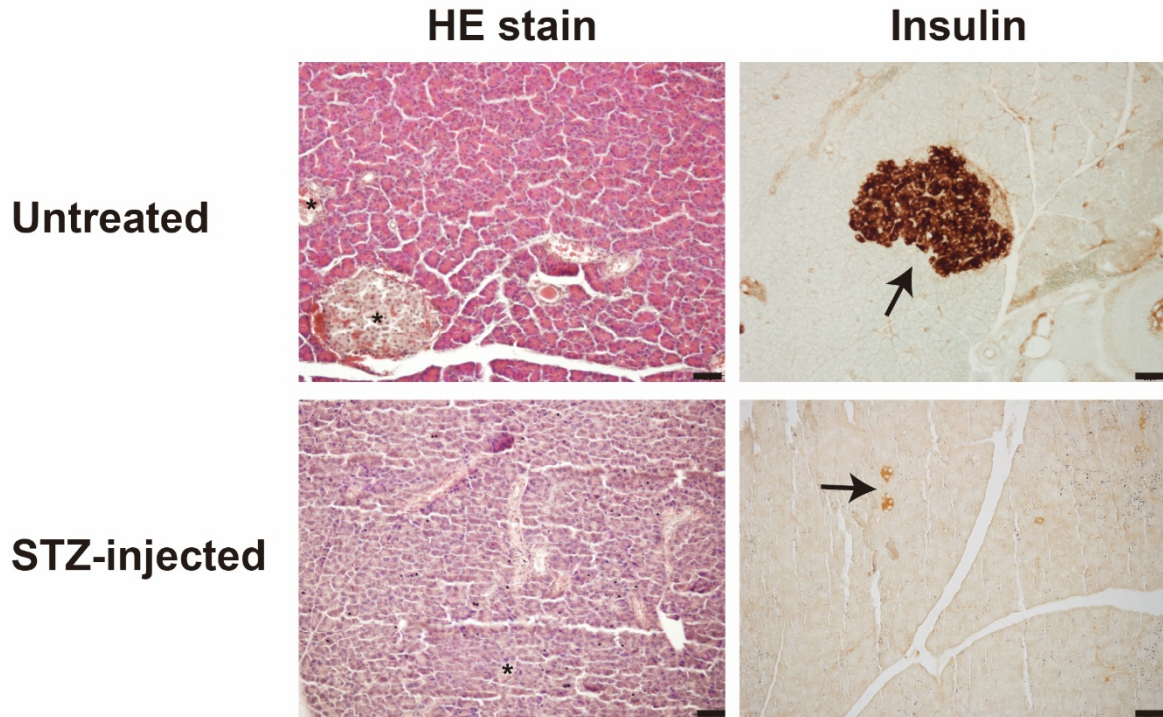

## Full length blot image

**The expression level of LGR4 was increased by 4HR administration.**

A.  $\beta$ -actin (from left lane to right, **1:** rat1's testis from STZ group, **2:** rat2's testis from STZ group, **3:** rat3's testis from STZ group, **4:** rat4's testis from STZ group, **5:** rat5's testis from STZ group, **6:** rat1's testis from STZ/4HR group, **7:** rat2's testis from STZ/4HR group, **8:** rat3's testis from STZ/4HR group, **9:** rat4's testis from STZ/4HR group, **10:** rat5's testis from STZ/4HR group)

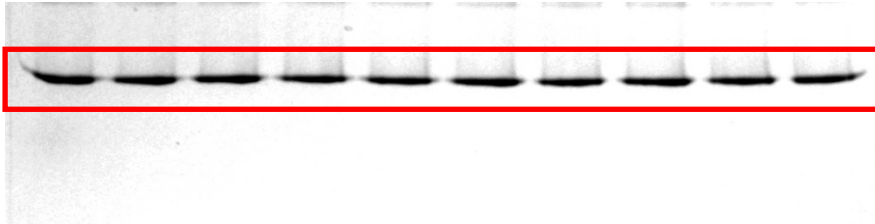

B. LGR4 (**1:** rat1's testis from STZ group, **2:** rat2's testis from STZ group, **3:** rat3's testis from STZ group, **4:** rat4's testis from STZ group, **5:** rat5's testis from STZ group, **6:** rat1's testis from STZ/4HR group, **7:** rat2's testis from STZ/4HR group, **8:** rat3's testis from STZ/4HR group, **9:** rat4's testis from STZ/4HR group, **10:** rat5's testis from STZ/4HR group)

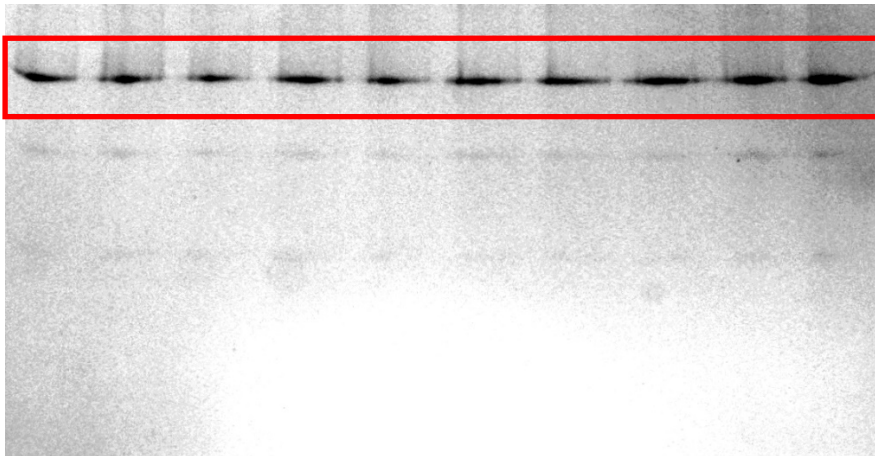

Supplement: s1 [file s1]
